# Supplementary material for: A bovine glucuronidase for assembly of β-d-glucuronyl-(1–3)-6-O-sulfo-β-d-gluco- and galacto-pyranosyl linkages
Source: Royal Society of Chemistry journal article supplement (doi:10.1039/b516921f), 2006-01-01
Supplement: b516921f.pdf [file b516921f.pdf]

## A bovine glucuronidase for assembly of $\beta$ -D-glucuronyl-(1-3)-6-O-sulfo- $\beta$ -D-glucopyranosyl linkages

Hiroataka Uzawa,<sup>a</sup> Takehiro Nagatsuka,<sup>a</sup> Hideo Hiramatsu<sup>b</sup> and Yoshihiro Nishida<sup>c</sup>

<sup>a</sup> *Research Center of Advanced Bionics, National Institute of Advanced Industrial Science and Technology (AIST), Central 5, 1-1-1 Higashi, Tsukuba 305-8565, Japan*

<sup>b</sup> *College of Industrial Technology, Nihon University, 1-2-2 Izumi-cho, Narashino, Chiba 275, Japan*

<sup>c</sup> *Department of Molecular Design and Engineering, Graduate School of Engineering, Nagoya University, Chikusa, Nagoya 464-8603, Japan*

### Supporting information

#### Enzymatic synthesis of dimeric products, $\beta$ -D-GlcA-(1 $\rightarrow$ 3)- $\beta$ -D-GlcA-O-*p*NP (2) and $\beta$ -D-GlcA-(1 $\rightarrow$ 2)- $\beta$ -D-GlcA-O-*p*NP (3)

Commercially available *p*-nitrophenyl glucuronic acid (*p*NP GlcA) from Sigma was treated with NaHCO<sub>3</sub> to give *p*NP glucuronate **1** quantitatively. A mixture of **1** (50 mg, 0.15 mmol) and bovine liver glucuronidase (Sigma, 5000U) dissolved in 0.1M AcONa-AcOH buffer (pH 6.0, 100  $\mu$ L) were incubated at 35°C for 24h. The reaction mixture was boiled for 5 min to stop the enzyme reaction, then the mixture was purified with an ODS HPLC column (Synergi Fusion, Phenomenex. H<sub>2</sub>O-MeOH = 7:3 containing 0.05% TFA) to give **2** (10 mg) and **3** (7 mg), respectively.

Compound **2**:  $[\alpha]_D^{25} = -45^\circ$  (c 0.87, H<sub>2</sub>O); <sup>1</sup>H NMR (600 MHz, D<sub>2</sub>O, *t*-BuOH 1.23):  $\delta$  8.26 (d,  $J = 9.5$  Hz, *p*NP), 7.24 (d,  $J = 9.5$  Hz, *p*NP), 5.29 (d,  $J = 8.0$  Hz, H-1), 4.85 (d,  $J = 8.0$  Hz, H-1'), 3.97 (d,  $J = 9.9$  Hz, H-5), 3.93 (t,  $J = 9.0$  Hz, H-3), 3.87 (t,  $J = 6.8$  Hz, H-2), 3.75-3.70 (overlap, H-4, H-4'), 3.54-3.54 (m, H-3', 5'), 3.41 (t, 8.6 Hz, H-2'); <sup>13</sup>C NMR (150 MHz, D<sub>2</sub>O, *t*-BuOH 31.2),  $\delta$  163.4 (Ar), 144.3 (Ar), 127.7 (Ar), 118.2 (Ar), 103.9 (C-1), 100.8 (C-1'), 84.2 (C-3), 78.1 (C-4), 77.4 (C-5), 77.0 (C-5'), 74.9 (C-2'), 74.3 (C-2), 73.4 (C-3'), 71.7 (C-4). ESI-MS; 490.2 [M+H]<sup>+</sup>.

Compound **3**:  $[\alpha]_D^{25} = -35^\circ$  (c 0.88, H<sub>2</sub>O); <sup>1</sup>H NMR (600 MHz, D<sub>2</sub>O, *t*-BuOH 1.23):  $\delta$  8.22 (d,  $J = 9.0$  Hz, *p*NP), 7.19 (d,  $J = 9.0$  Hz, *p*NP), 5.77 (d,  $J = 6.6$  Hz, H-1), 4.81 (d,  $J = 7.8$  Hz, H-1'), 4.24 (d,  $J = 9.6$  Hz, H-5), 3.89 (t,  $J = 6.8$  Hz, H-2), 3.86-3.84 (m, H-3, 5'), 3.76 (t,  $J = 9.3$  Hz, H-4), 3.55 (t,  $J = 9.3$  Hz, H-3'), 3.44 (t,  $J = 9.6$  Hz, H-4'), 3.37 (d,  $J = 7.8$  Hz, H-2'); <sup>13</sup>C NMR (150 MHz, D<sub>2</sub>O, *t*-BuOH 31.2),  $\delta$  162.7 (Ar), 144.2 (Ar), 127.9 (Ar), 117.3 (Ar), 104.4 (C-1), 99.4 (C-1'), 83.8 (C-2), 76.5 (C-3', 5'), 76.0 (C-5), 74.8 (C-2'), 72.9 (C-4'), 72.1 (C-3), 71.4 (C-4). ESI-MS; 490.2 [M+H]<sup>+</sup>.

Chemical synthesis of a glycosyl acceptor, 6-O-sulfo-Glc-O-pNP (4)

A mixture of *p*NP β-D-glucopyranoside from Sigma (1 g, 3.32 mmol) and SO<sub>3</sub>-NMe<sub>3</sub> from Sigma (1.38 g, 9.9 mmol) was dissolved in DMF (35 mL) at 40°C. After 90 min, the reaction mixture was diluted with MeOH (10 ml) and concentrated *in vacuo*. The residue was then purified by sequential column chromatography with Sephadex LH-20, ODS C-18 and ion exchange resin (Dowex Na<sup>+</sup>) to afford **4** (994 mg, 68 %).

$[\alpha]_D^{25} = -88.9$  (c 1.79, H<sub>2</sub>O); <sup>1</sup>H NMR (400 MHz, D<sub>2</sub>O): δ 8.26 (d, 2H, *J* = 9.2 Hz, Ar), 7.25 (d, 2H, *J* = 9.2 Hz, Ar), 5.27 (d, 1H, *J* = 8.0 Hz, H-1), 4.38 (dd, 1H, *J* = 2.0, 11.2 Hz, H-6a), 4.23 (dd, 1H, *J* = 5.6, 11.2 Hz, H-6b), 3.94 (ddd, 1H, *J* = 2.0, 5.6, 9.6 Hz, H-5), 3.66-3.55 (m, 3H, H-2, 3, 4), 2.88 (s, 9H, N(Me)<sub>3</sub>); <sup>13</sup>C NMR (150 MHz, D<sub>2</sub>O, *t*BuOH 31.2) δ 163.2 (Ar), 144.1 (Ar), 127.7 (Ar), 118.1 (Ar), 101.0 (C-1), 76.8 (C-3), 75.7 (C-5), 74.2 (C-2), 70.6 (C-4), 68.4 (C-6), 46.3 (NMe<sub>3</sub>). ESI-MS; 380.1 [M]<sup>-</sup>.

Chemical synthesis of a glycosyl acceptor, 6-O-sulfo-Glc-S-pNP (5)

A mixture of *p*NP 1-thio-β-D-glucopyranoside from Sigma (400 mg, 1.26 mmol) and SO<sub>3</sub>-NMe<sub>3</sub> (277 mg, 1.99 mmol) was dissolved in DMF (11 mL) at 40°C for 90 min. The reaction mixture was then processed in the same way described for compound **4** to give **5** (337 mg, 59 %).

$[\alpha]_D^{25} = -83.9$  (C 3.88, H<sub>2</sub>O); <sup>1</sup>H NMR (400 MHz, D<sub>2</sub>O): δ 8.22 (d, 2H, *J* = 9.2 Hz, Ar), 7.69 (d, 2H, *J* = 9.2 Hz, Ar), 5.08 (d, 1H, *J* = 9.6 Hz, H-1), 4.40 (dd, 1H, *J* = 2.0, 11.6 Hz, H-6a), 4.21 (dd, 1H, *J* = 6.0, 11.6 Hz, H-6b), 3.87 (ddd, 1H, *J* = 2.0, 6.0, 9.6 Hz, H-5), 3.61-3.46 (m, 3H, H-2, 3, 4), 2.88 (s, 9H, N(Me)<sub>3</sub>); <sup>13</sup>C NMR (150 MHz, D<sub>2</sub>O, *t*BuOH 31.2) δ 147.6 (Ar), 144.9 (Ar), 130.6 (Ar), 125.7 (Ar), 87.2 (C-1), 79.2 (C-5), 78.6 (C-3), 73.2 (C-2), 70.6 (C-4), 68.7 (C-6), 46.3 (NMe<sub>3</sub>). ESI-MS; 396.1 [M]<sup>-</sup>.

Chemical synthesis of a glycosyl acceptor, 6-O-sulfo-Gal-O-pNP (10)

A mixture of *p*NP β-D-galactopyranoside from Sigma (200 mg, 0.66 mmol) and SO<sub>3</sub>-NMe<sub>3</sub> (554 mg, 3.98 mmol) was dissolved in DMF (18 mL) at 40°C for 90 min. The reaction mixture was then processed in the same way described for compound **4** to give **10** (198 mg, 68 %).

$[\alpha]_D^{25} = -63.4$  (c 2.59, H<sub>2</sub>O); <sup>1</sup>H NMR (400 MHz, D<sub>2</sub>O): δ 8.26 (d, 2H, *J* = 9.2 Hz, Ar), 7.26 (d, 2H, *J* = 9.2 Hz, Ar), 5.21 (d, 1H, *J* = 7.2 Hz, H-1), 4.26-4.19 (m, 3H, H-6a, 6b, 5), 4.07 (brd, 1H, *J* = 2.8 Hz, H-4), 3.87 (dd, 1H, *J* = 7.2, 10.0 Hz, H-2), 3.81 (dd, 1H, *J* = 3.6, 10.0 Hz, H-3), 2.88 (s, 9H, N(Me)<sub>3</sub>); <sup>13</sup>C NMR (150 MHz, D<sub>2</sub>O, *t*BuOH 31.2) δ 163.4 (Ar), 144.2 (Ar), 127.7 (Ar), 118.1 (Ar), 101.5 (C-1), 74.8 (C-5), 73.8 (C-3), 71.3 (C-2),

69.8 (C-4), 68.6 (C-6), 46.3 (NMe<sub>3</sub>). ESI-MS; 380.1 [M]<sup>-</sup>.

Chemical synthesis of a glycosyl acceptor, 6-*O*-sulfo-Gal-*S*-*p*NP (**11**)

A mixture of *p*NP 1-thio-β-D-galactopyranoside from Sigma (300 mg, 0.95 mmol) and SO<sub>3</sub>-NMe<sub>3</sub> (277 mg, 1.99 mmol) was dissolved in DMF (11 mL) at 40°C for 90 min. The reaction mixture was then processed in the same way described for compound **4** to give **11** (277 mg, 64 %).

[α]<sub>D</sub><sup>25</sup> = -86.7 (c 1.95, H<sub>2</sub>O); <sup>1</sup>H NMR (600 MHz, D<sub>2</sub>O): δ 8.20 (d, 2H, *J* = 9.2 Hz, Ar), 7.66 (d, 2H, *J* = 9.2 Hz, Ar), 5.04 (d, 1H, *J* = 9.0 Hz, H-1), 4.22 (dd, 1H, *J* = 4.8, 11.4 Hz, H-6a), 4.18 (t, 1H, *J* = 9.3 Hz, H-5) 4.13 (dd, 1H, *J* = 4.8, 11.4 Hz, H-6b), 4.08 (d, 1H, *J* = 2.2 Hz, H-4), 3.78-3.71 (m, 2H, H-2, 3), 2.88 (s, 9H, N(Me)<sub>3</sub>); <sup>13</sup>C NMR (150 MHz, D<sub>2</sub>O, *t*BuOH 31.2) δ 147.4 (Ar), 145.6 (Ar), 130.1 (Ar), 125.8 (Ar), 87.6 (C-1), 78.2 (C-5), 75.3 (C-3), 70.6 (C-2), 70.0 (C-4), 69.0 (C-6), 46.3 (NMe<sub>3</sub>). ESI-MS; 396.1 [M]<sup>-</sup>.

Enzymatic synthesis of β-D-GlcA-(1→3)-β-D-6-*O*-sulfo-Glc-*O*-*p*NP (**6**) and β-D-GlcA-(1→2)-β-D-6-*O*-sulfo-Glc-*O*-*p*NP (**8**)

A mixture of **1** (121mg, 0.36 mmol), **4** (207mg, 0.47 mmol) and bovine liver glucuronidase (Sigma, 5000U) dissolved in 0.1M AcONa-AcOH buffer (pH 6.0, 1.4mL) were incubated at 35°C for 24h. The reaction mixture was boiled for 5 min to stop the enzyme reaction, then the mixture was purified with an ODS HPLC column (Synergi Fusion, Phenomenex. H<sub>2</sub>O-MeOH = 7:3 containing 0.05% TFA ) to give **6** (32mg) and **8** (10mg) based on the consumed donor, respectively.

Compound **6**: [α]<sub>D</sub><sup>25</sup> = -58° (c 0.48, H<sub>2</sub>O); <sup>1</sup>H NMR (600 MHz, D<sub>2</sub>O, *t*-BuOH 1.23) δ 8.265 (d, 2H, *J* = 9.1 Hz, Ar), 7.255 (d, 2H, *J* = 9.1 Hz, Ar), 5.300 (d, 1H, *J* = 7.7 Hz, H-1), 4.820 (d, 1H, *J* = 7.7 Hz, H-1'), 4.392 (dd, 1H, *J* = 2.2, 11.4 Hz, H-6a), 4.227 (dd, 1H, *J* = 2.2, 11.4 Hz, H-6b), 3.970 (ddd, 1H, *J* = 1.8, 5.5, 9.9 Hz, H-5), 3.916 (t, 1H, *J* = 9.0 Hz, H-3), 3.854 (t, 1H, *J* = 9.0 Hz, H-2), 3.743 (d, 1H, *J* = 9.5 Hz, H-5'), 3.673 (dd, 1H, *J* = 8.8, 9.9 Hz, H-4), 3.558-3.512 (m, 2H, H-3', H-4'), 3.425-3.400 (m, 1H, H-2'); <sup>13</sup>C NMR (150 MHz, D<sub>2</sub>O, *t*-BuOH = 31.2) δ 178.3 (C-6'), 164.2 (Ar), 145.2(Ar), 128.6 (Ar), 119.0 (Ar), 105.0 (C-1'), 101.7 (C-1), 85.8 (C-3), 78.2 (C-5'), 77.9 (C-3'), 76.3 (C-5), 75.8 (C-2'), 75.1 (C-2), 74.3 (C-4'), 70.2 (C-4), 69.4 (C-6). ESI-MS; 556.2 [M+H]<sup>+</sup> ; 578.2 [M+Na]<sup>+</sup>.

Compound **8**: [α]<sub>D</sub><sup>25</sup> = -34° (c 0.65, H<sub>2</sub>O); <sup>1</sup>H NMR (600 MHz, D<sub>2</sub>O, *t*-BuOH = 1.23) δ 8.243 (d, 2H, *J* = 9.2 Hz, Ar), 7.204 (d, 2H, *J* = 9.2 Hz, Ar), 5.505 (d, 1H, *J* = 7.3 Hz, H-1), 4.821 (d, 1H, *J* = 8.0 Hz, H-1'), 4.356 (dd, 1H, *J* = 2.2, 11.4 Hz, H-6a), 4.217 (dd, 1H, *J* = 5.5, 11.4 Hz, H-6b), 3.944 (ddd, 1H, *J* = 1.8, 5.2, 9.9 Hz, H-5), 3.876-3.804 (m, 2H, H-2,

5'), 3.819 (t, 1H,  $J = 9.2$  Hz, H-3), 3.633 (t, 1H,  $J = 9.5$  Hz, H-4), 3.555 (t, 1H,  $J = 9.5$  Hz, H-3'), 3.436 (t, 1H,  $J = 9.3$  Hz, H-4'), 3.360-3.313 (overlap, H-2');  $^{13}\text{C}$  NMR (100 MHz,  $\text{D}_2\text{O}$ ,  $t\text{-BuOH} = 31.2$ )  $\delta$  162.8 (Ar), 144.1 (Ar), 128.0 (Ar), 117.3 (Ar), 104.4 (C-1'), 99.6 (C-1), 84.0 (C-2), 76.5 (C-4'), 76.3 (C-3), 75.3 (C-5), 74.8 (C-3'), 72.9 (C-5'), 71.4 (C-2'), 70.1 (C-4), 68.3 (C-6). ESI-MS; 556.2  $[\text{M}+\text{H}]^+$ .

Enzymatic synthesis of  $\beta\text{-D-GlcA-(1}\rightarrow\text{3)-}\beta\text{-D-6-O-sulfo-Glc-S-pNP}$  (7) and  $\beta\text{-D-GlcA-(1}\rightarrow\text{2)-}\beta\text{-D-6-O-sulfo-Glc-S-pNP}$  (9)

A mixture of **1** (162mg, 0.48 mmol), **5** (335mg, 0.73 mmol) and bovine liver glucuronidase (Sigma, 5000U) dissolved in 0.1M AcONa-AcOH buffer (pH 6.0, 2.0 mL) were incubated at 35°C for 24h. The reaction mixture was boiled for 5 min to stop the enzyme reaction, then the mixture was purified with an ODS HPLC column (Synergi Fusion, Phenomenex.  $\text{H}_2\text{O-MeOH} = 7:3$  containing 0.05% TFA) to give **7** (15 mg) and **9** (10 mg), respectively.

Compound **7**:  $[\alpha]_D^{25} = -51$  (c 0.27,  $\text{H}_2\text{O}$ );  $^1\text{H}$  NMR (600 MHz,  $\text{D}_2\text{O}$ ,  $t\text{-BuOH} = 1.23$ )  $\delta$  8.148 (d, 2H,  $J = 9.1$  Hz, Ar), 7.633 (d, 2H,  $J = 9.1$  Hz, Ar), 5.034 (d, 1H,  $J = 9.9$  Hz, H-1), 4.800 (d, 1H,  $J = 7.7$  Hz, H-1'), 4.391 (dd, 1H,  $J = 1.9, 11.4$  Hz, H-6a), 4.198 (dd, 1H,  $J = 6.2, 11.4$  Hz, H-6b), 3.873-3.843 (m, 1H, H-5), 3.848 (t, 1H,  $J = 9.0$  Hz, H-3), 3.742 (d, 1H,  $J = 7.3$  Hz, H-5'), 3.684 (dd, 1H,  $J = 9.2, 9.9$  Hz, H-4), 3.566-3.514 (m, 2H, H4', 3'), 3.400 (t, 1H,  $J = 8.6$  Hz, H-2');  $^{13}\text{C}$  NMR (150 MHz,  $\text{D}_2\text{O}$ ,  $t\text{BuOH} = 31.2$ )  $\delta$  146.4 (Ar), 142.7 (Ar), 131.3 (Ar), 125.7 (Ar), 104.0 (C-1'), 87.1 (C-1), 86.9 (C-3), 79.0 (C-5), 76.7 (C-3'), 76.0 (C-5'), 74.6 (C-2'), 72.7 (C-2, C-4'), 69.2 (C-6). ESI-MS; 572.2  $[\text{M}+\text{H}]^+$ ; 594.1  $[\text{M}+\text{Na}]^+$ .

Compound **9**:  $[\alpha]_D^{25} = -9$  (c 0.65,  $\text{H}_2\text{O}$ );  $^1\text{H}$  NMR (600 MHz,  $\text{D}_2\text{O}$ ,  $t\text{-BuOH} = 1.23$ )  $\delta$  8.242 (d, 2H,  $J = 9.1$  Hz, Ar), 7.214 (d, 2H,  $J = 9.2$  Hz, Ar), 5.500 (d, 1H,  $J = 7.3$  Hz, H-1), 4.798 (d, 1H,  $J = 7.7$  Hz, H-1'), 4.361 (dd, 1H,  $J = 1.8, 11.4$  Hz, H-6a), 4.220 (dd, 1H,  $J = 5.5, 11.4$  Hz, H-6b), 3.946 (ddd, 1H,  $J = 1.8, 5.1, 9.9$  Hz, H-5), 3.870 (dd, 1H,  $J = 7.7, 9.2$  Hz, H-2), 3.826 (t, 1H,  $J = 9.0$  Hz, H-3), 3.713 (d, 1H,  $J = 9.5$  Hz, H-5'), 3.628 (t, 1H,  $J = 9.5$  Hz, H-4), 3.534 (t, 1H,  $J = 9.3$  Hz, H-3'), 3.419 (t, 1H,  $J = 9.3$  Hz, H-4'), 3.362-3.325 (m, 1H, H-2');  $^{13}\text{C}$  NMR (150 MHz,  $\text{D}_2\text{O}$ ,  $t\text{-BuOH} = 31.2$ )  $\delta$  164.2 (Ar), 143.1 (Ar), 131.0 (Ar), 125.6 (Ar), 104.5 (C-1'), 84.9 (C-1), 79.2 (C-2), 78.8 (C-5), 76.7 (C-3'), 76.3 (C-5'), 74.7 (C-2'), 72.8 (C-4'), 71.2, 70.5 (C-3, 4), 68.7 (C-6). ESI-MS; 572.2  $[\text{M}+\text{H}]^+$ , 594.2  $[\text{M}+\text{Na}]^+$ .

Enzymatic synthesis of  $\beta\text{-D-GlcA-(1}\rightarrow\text{3)-}\beta\text{-D-6-O-sulfo-Gal-O-pNP}$  (12)

A mixture of **1** (110 mg, 0.33 mmol), **10** (287 mg, 0.65 mmol) and bovine liver

glucuronidase (Sigma, 4000U) dissolved in 0.1M AcONa-AcOH buffer (pH 6.0, 1.5 mL) were incubated at 35°C for 24h. The reaction mixture was then processed in the same way described for compounds **6** and **8** to give **12** (59 mg).

Compound **12**:  $[\alpha]_D^{25} = -61.8^\circ$  (c 1.60, H<sub>2</sub>O); <sup>1</sup>H NMR (600 MHz, D<sub>2</sub>O, *t*-BuOH 1.23): δ 8.253(d, *J* = 9.1 Hz, *p*NP), 7.260 (d, *J* = 9.2 Hz, *p*NP), 5.251 (d, *J* = 7.7 Hz, H-1), 4.725 (d, *J* = 7.7 Hz, H-1'), 4.331(d, *J* = 3.3 Hz, H-4), 4.275 (dd, *J* = 9.5 Hz, H-6a), 4.223 - 4.178 (m, H-6b, H-5), 4.025 (dd, *J* = 7.7, 9.9 Hz, H-2), 3.965 (dd, *J* = 3.3, 9.9 Hz, H-3), 3.744 (d, *J* = 9.5 Hz, H-5'), 3.553-3.506 (m, H-3', H-4'), 3.444 (t, *J* = 8.6 Hz, H-2'); <sup>13</sup>C NMR (100 MHz, *t*-BuOH 31.2), δ 177.5 (C-6'), 163.3 (Ar), 144.2 (Ar), 127.7(Ar), 118.1 (Ar), 105.3 (C-1'), 101.2 (C-1), 83.5 (C-3), 77.8 (C-5'), 76.9 (C-4'), 74.8 (C-5), 74.7 (C-2'), 73.4 (C-3'), 71.0 (C-2), 69.4 (C-4), 69.1 (C-6). ESI-MS; 556.2 [M+H]<sup>+</sup>.

#### Enzymatic synthesis of β-D-GlcA-(1→3)-β-D-6-O-sulfo-Gal-S-*p*NP (**13**)

A mixture of **1** (100 mg, 0.30 mmol), **11** (276 mg, 0.61 mmol) and bovine liver glucuronidase (Sigma, 5000U) dissolved in 0.1M AcONa-AcOH buffer (pH 6.0, 2.0 mL) were incubated at 35°C for 24h. The reaction mixture was then processed in the same way described for compounds **6** and **8** to give **13** (25 mg).

Compound **13**:  $[\alpha]_D^{25} = -78^\circ$  (c 0.78, H<sub>2</sub>O); <sup>1</sup>H NMR (600 MHz, CD<sub>3</sub>OD, *t*-BuOH 1.40): δ 8.360 (d, *J* = 9.2 Hz, *p*NP), 7.912 (d, *J* = 9.2 Hz, *p*NP), 5.082 (d, *J* = 9.9 Hz, H-1), 4.778 (d, *J* = 7.7 Hz, H-1'), 4.438 (brd, *J* = 2.6 Hz, H-4), 4.408 (d, *J* = 5.5Hz, H-6a, 6b), 4.239 (t, *J* = 5.7 Hz, H-5), 4.058 (t, *J* = 9.5 Hz, H-2), 3.942 (dd, *J* = 2.8, 12.1 Hz, H-3), 3.813 (d, *J* = 7.3 Hz, H-5'), 3.473-3.409 (m, H-4', H-3'), 3.528-3.484 (m, H-2'); <sup>13</sup>C NMR (100 MHz, CD<sub>3</sub>OH 49.0), δ 147.2 (Ar), 146.8 (Ar), 129.9 (Ar), 124.9 (Ar), 105.5 (C-1'), 87.5 (C-1), 86.1 (C-3), 78.3 (C-5), 77.5 (C-4'), 75.2 (C-3'), 73.6 (C-2'), 69.8 (C-3'), 69.6 (C-2), 69.4 (C-4) 68.9 (C-6). ESI-MS; 572.2 [M+H]<sup>+</sup>, 594.2 [M+Na]<sup>+</sup>.
